# Supplementary material for: Deep neural network heatmaps capture Alzheimer’s disease patterns reported in a large meta-analysis of neuroimaging studies
Source: PubMed Central journal article supplement — Neuroimage. Author manuscript; Available in PMC 2024 Jun 6. (PMC11155416; doi:10.1016/j.neuroimage.2023.119929), 2023-02-04
Supplement: NIHMS1995013-supplement-1.pdf [file NIHMS1995013-supplement-1.pdf]

# Deep neural network heatmaps capture Alzheimer’s disease patterns reported in a large meta-analysis of neuroimaging studies: Supplementary Material

Di Wang, Nicolas Honnorat, Peter T. Fox, Kerstin Ritter,  
Simon B. Eickhoff, Sudha Seshadri, Mohamad Habes

## 1 Dice overlaps for the synthetic data

The following Figures report the Dice overlaps between the hippocampus regions altered in the synthetic data sets and the brain regions captured by the [activation patterns](#) of the best SVMs and the heatmap values of the best CNN and [ModelE](#) classifiers, for the single-subject data set (Figure 1), and the whole-cohort data set (Figure 4). The heatmaps corresponding to the best overlaps are shown in Figure 2 (for the single-subject data) and 5 (for the whole-cohort data). Unsmoothed heatmaps thresholded at 5% are shown in the following Figures (Figure 3 for single-subject, Figure 6 for whole-cohort).

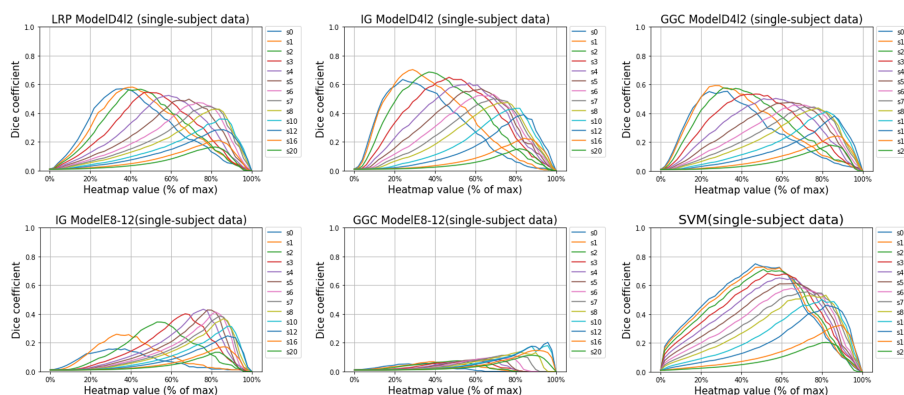

Figure 1: Dice overlap, for the single-subject simulated data, between all the smoothed heatmaps and the hippocampus map for ModelD4I2, ModelE8-12 and the best linear SVM. s0 corresponds to the heatmaps before smoothing, s1 corresponds to the heatmaps after 1 mm FWHM Gaussian smoothing, and similarly for other smoothing FWHM.

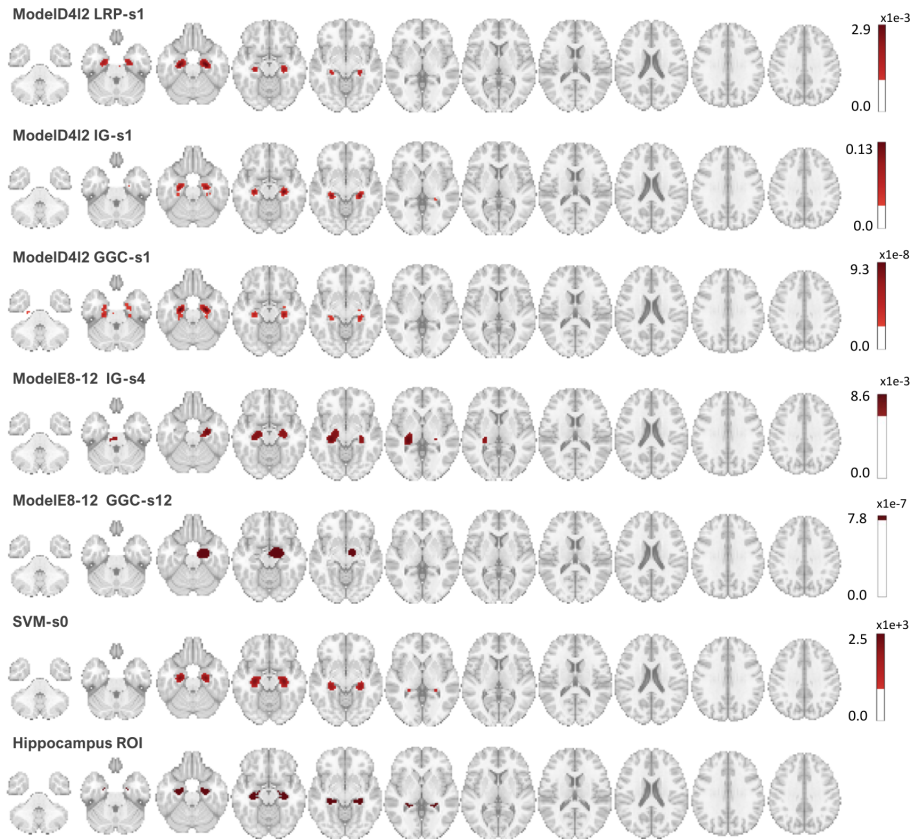

Figure 2: Heatmaps derived for the single-subject simulated data and corresponding to the best Dice overlap with the hippocampus region where the synthetic effect has been introduced, for ModelD4I2, ModelE8-12 and the best linear SVM.

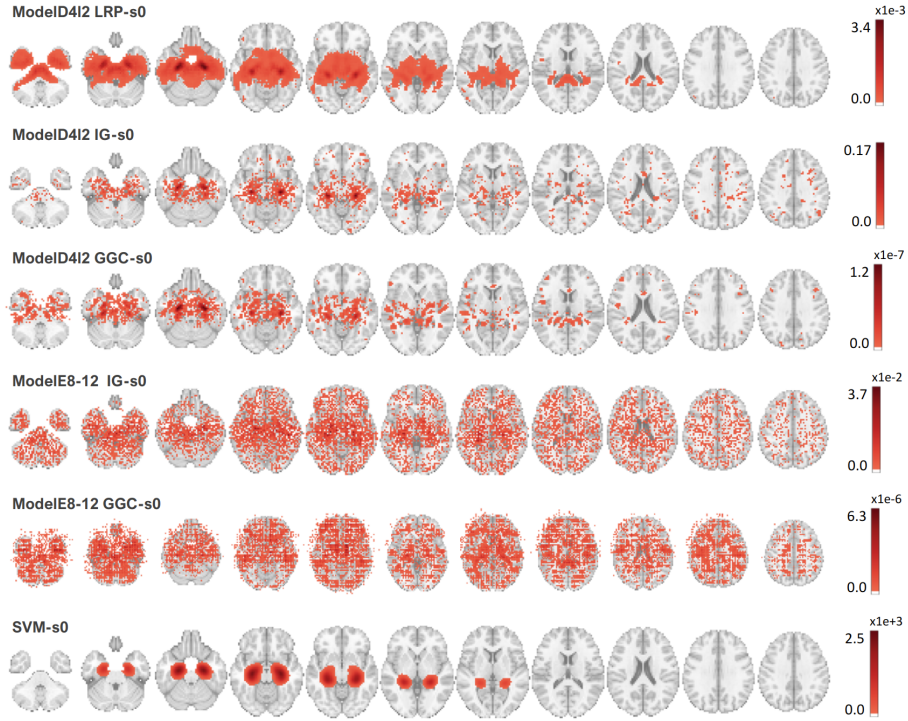

Figure 3: Heatmaps derived for the single-subject simulated data, without smoothing, and thresholded at 5% of their maximum value.

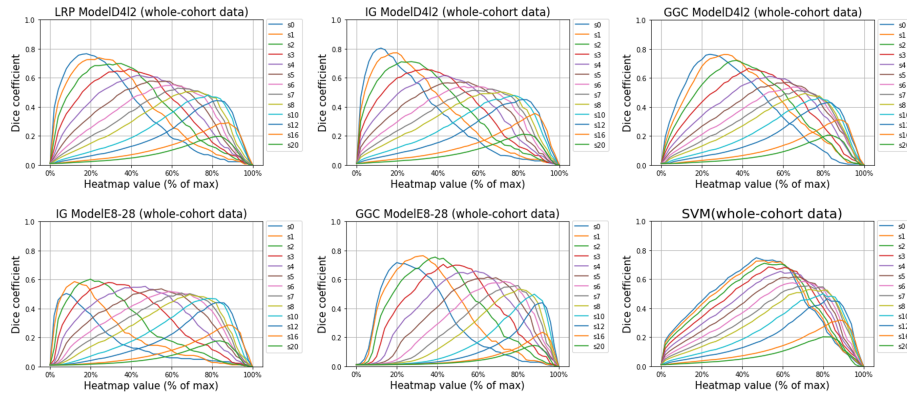

Figure 4: Dice overlap, for the whole-cohort simulated data, between all the smoothed heatmaps and the hippocampus map for ModelD4I2, ModelE8-28 and the best linear SVM. s0 corresponds to the heatmaps before smoothing, s1 corresponds to the heatmaps after 1 mm FWHM Gaussian smoothing, and similarly for other smoothing FWHM.

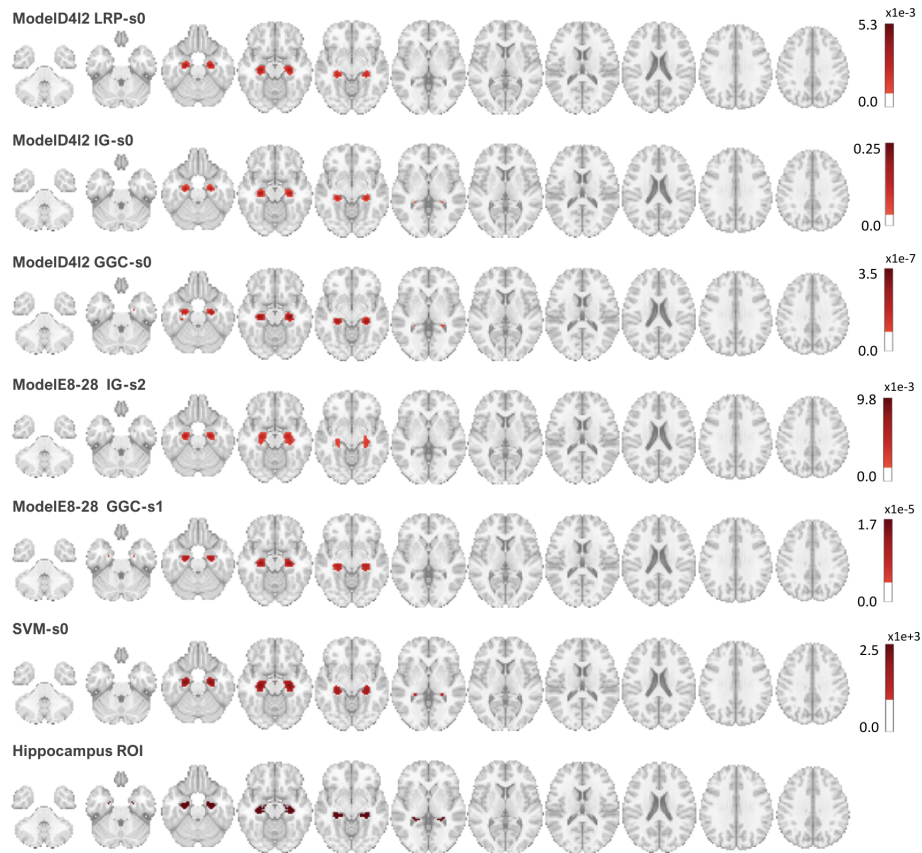

Figure 5: Heatmaps derived for the whole-cohort simulated data and corresponding to the best Dice overlap with the hippocampus region where the synthetic effect has been introduced, for ModelD412, ModelE8-28 and the best linear SVM.

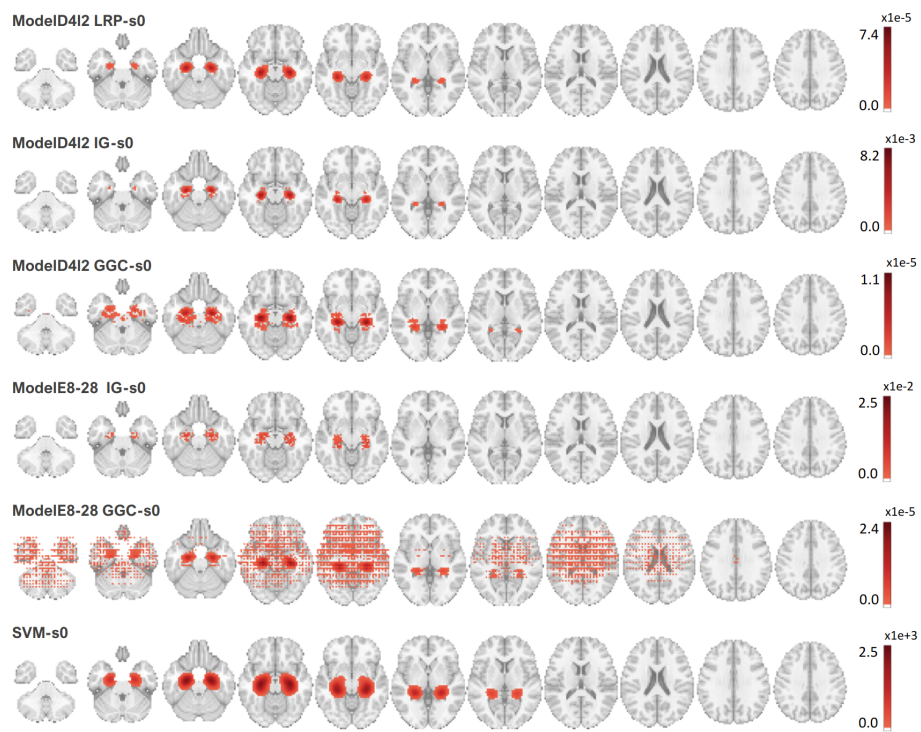

Figure 6: Heatmaps derived for the whole-cohort simulated data, without smoothing, and thresholded at 5% of their maximum value.

## 2 VBM studies included in the meta-analysis

The voxel-based morphometry studies combined in our meta-analysis are reported in Table 1.

| Article                                  | Experiment | $n$ | Data source                                                     |
|------------------------------------------|------------|-----|-----------------------------------------------------------------|
| Barbeau E et al., 2008 <sup>1</sup>      | MCI < CN   | 28  | Universit ´e de Toulouse                                        |
| Baron JC et al., 2001 <sup>2</sup>       | AD < CN    | 19  | University of Caen                                              |
| Baxter LC et al., 2006 <sup>3</sup>      | AD < CN    | 15  | Sun Health Research Institute                                   |
| Bell-McGinty S et al., 2005 <sup>4</sup> | MCI < CN   | 37  | University of Pittsburgh                                        |
| Berlinger M et al., 2008 <sup>5</sup>    | AD < CN    | 21  | University of Milano-Bicocca                                    |
| Bozzali M et al., 2012 <sup>6</sup>      | AD < CN    | 31  | IRCCS Fondazione Santa Lucia                                    |
| Bozzali M et al., 2006 <sup>7</sup>      | Conv < CN  | 14  | IRCCS Fondazione Santa Lucia                                    |
| Bozzali M et al., 2006 <sup>7</sup>      | Non < CN   | 8   | IRCCS Fondazione Santa Lucia                                    |
| Brambati et al., 2009 <sup>8</sup>       | AD < CN    | 10  | McGill Center for Studies in Aging                              |
| Brambati et al., 2009 <sup>8</sup>       | MCI < CN   | 11  | McGill Center for Studies in Aging                              |
| Brambati et al., 2009 <sup>8</sup>       | MCI < CN   | 14  | McGill Center for Studies in Aging                              |
| Brenneis C et al., 2004 <sup>9</sup>     | AD < CN    | 10  | General Hospital of Linz                                        |
| Brys M et al., 2009 <sup>10</sup>        | Conv < CN  | 8   | New York University School of Medicine, Center for Brain Health |
| Canu E et al., 2012 <sup>11</sup>        | EOAD < CN  | 18  | IRCCS Centro San Giovanni di Dio Fatebenefratelli               |
| Canu E et al., 2012 <sup>11</sup>        | LOAD < CN  | 24  | IRCCS Centro San Giovanni di Dio Fatebenefratelli               |

|                                          |           |    |                                                    |
|------------------------------------------|-----------|----|----------------------------------------------------|
| Caroli A et al., 2007 <sup>12</sup>      | Conv < CN | 9  | IRCCS San Giovanni di Dio-FBF                      |
| Caroli A et al., 2007 <sup>12</sup>      | Non < CN  | 14 | IRCCS San Giovanni di Dio-FBF                      |
| Chen et al., 2011 <sup>13</sup>          | AD < CN   | 15 | Pennsylvania's Alzheimer's Disease Center          |
| Chetelat G et al., 2002 <sup>14</sup>    | AD < CN   | 16 | University of Caen                                 |
| Chetelat G et al., 2002 <sup>14</sup>    | MCI < CN  | 22 | University of Caen                                 |
| Colloby SJ et al., 2014 <sup>15</sup>    | AD < CN   | 47 | Newcastle University                               |
| Defrancesco M et al., 2014 <sup>16</sup> | Conv < CN | 13 | University Clinic of Innsbruck                     |
| Derflinger S et al., 2011 <sup>17</sup>  | AD < CN   | 35 | Technische Universität Munchen, Munich, Germany    |
| Derflinger S et al., 2011 <sup>17</sup>  | MCI < CN  | 24 | Technische Universität Munchen, Munich, Germany    |
| Dos Santos V et al., 2011 <sup>18</sup>  | AD < CN   | 34 | Heidelberg University                              |
| Dos Santos V et al., 2011 <sup>18</sup>  | MCI < CN  | 60 | Heidelberg University                              |
| Farrow TFD et al., 2007 <sup>19</sup>    | AD < CN   | 7  | North Sheffield Research                           |
| Feldmann A et al., 2008 <sup>20</sup>    | AD < CN   | 6  | local                                              |
| Ford AH et al., 2014 <sup>21</sup>       | MCI < CN  | 65 | Perth Perception Study                             |
| Gee J et al., 2003 <sup>22</sup>         | AD < CN   | 12 | University of Pennsylvania Department of Neurology |
| Gold BT et al., 2010 <sup>23</sup>       | MCI < CN  | 12 | University of Kentucky                             |
| Guo X et al., 2010 <sup>24</sup>         | AD < CN   | 13 | Xuanwu Hospital                                    |
| Hamalainen A et al., 2007 <sup>25</sup>  | MCI < CN  | 43 | University of Kuopio                               |
| Hamalainen A et al., 2007 <sup>25</sup>  | MCI < CN  | 13 | University of Kuopio                               |

|                                         |           |    |                                                                                                                                |
|-----------------------------------------|-----------|----|--------------------------------------------------------------------------------------------------------------------------------|
| Hamalainen A et al., 2007 <sup>25</sup> | AD < CN   | 15 | University of Kuopio                                                                                                           |
| Han Y et al., 2012 <sup>26</sup>        | MCI < CN  | 17 | West China Hospital                                                                                                            |
| Hirao K et al., 2006 <sup>27</sup>      | AD < CN   | 61 | National Center Hospital for Mental, Nervous and Muscular Disorders, National Center of Neurology and Psychiatry, Tokyo, Japan |
| Honea RA et al., 2009 <sup>28</sup>     | AD < CN   | 60 | University of Kansas Brain Aging Project                                                                                       |
| Hong YJ et al., 2015 <sup>29</sup>      | MCI < CN  | 29 | Catholic University of Korea                                                                                                   |
| Hornberger et al., 2011 <sup>30</sup>   | AD < CN   | 15 | FRONTIER database                                                                                                              |
| Huang CW et al., 2017 <sup>31</sup>     | AD < CN   | 50 | Chang Gung Memorial Hospital                                                                                                   |
| Ibrahim I et al., 2009 <sup>32</sup>    | AD < CN   | 21 | local                                                                                                                          |
| Imabayashi E et al., 2013 <sup>33</sup> | AD < CN   | 5  | Japanese Alzheimer's Disease Neuroimaging Initiative                                                                           |
| Kim S et al., 2011 <sup>34</sup>        | AD < CN   | 10 | Chung-Ang University Hospital                                                                                                  |
| Kim S et al., 2011 <sup>34</sup>        | AD < CN   | 20 | Chung-Ang University Hospital                                                                                                  |
| Kim S et al., 2011 <sup>34</sup>        | AD < CN   | 31 | Chung-Ang University Hospital                                                                                                  |
| Lagarde J et al., 2015 <sup>35</sup>    | AD < CN   | 14 | Salpetriere Hospital                                                                                                           |
| Mazere J et al., 2008 <sup>36</sup>     | AD < CN   | 8  | University Hospital of Bordeaux                                                                                                |
| Miettinen PS et al., 2011 <sup>37</sup> | AD < CN   | 16 | University of Eastern Finland                                                                                                  |
| Miettinen PS et al., 2011 <sup>37</sup> | MCI < CN  | 18 | University of Eastern Finland                                                                                                  |
| Migliaccio R et al., 2009 <sup>38</sup> | EOAD < CN | 16 | University of California San Francisco                                                                                         |



|                                             |          |    |                                        |
|---------------------------------------------|----------|----|----------------------------------------|
| Mitolo et al., 2013 <sup>39</sup>           | MCI < CN | 20 | University of Padua, Padua             |
| Mok et al., 2012 <sup>40</sup>              | AD < CN  | 14 | Shin Kong Wu Ho-Su Memorial Hospita    |
| Mok et al., 2012 <sup>40</sup>              | AD < CN  | 10 | Shin Kong Wu Ho-Su Memorial Hospita    |
| Pa et al., 2009 <sup>41</sup>               | MCI < CN | 32 | University of California San Francisco |
| Pa et al., 2009 <sup>41</sup>               | MCI < CN | 26 | University of California San Francisco |
| Pennanen C et al., 2005 <sup>42</sup>       | MCI < CN | 51 | Kuopio University Hospital             |
| Polat et al., 2012 <sup>43</sup>            | AD < CN  | 31 | local                                  |
| Raji CA et al., 2009 <sup>44</sup>          | AD < CN  | 33 | CHS                                    |
| Rami L et al., 2009 <sup>45</sup>           | AD < CN  | 31 | local                                  |
| Rami L et al., 2009 <sup>45</sup>           | MCI < CN | 14 | local                                  |
| Remy F et al., 2005 <sup>46</sup>           | AD < CN  | 8  | local                                  |
| Samuraki M et al., 2007 <sup>47</sup>       | AD < CN  | 39 | Kanazawa University Hospital           |
| Saykin AJ et al., 2006 <sup>48</sup>        | MCI < CN | 40 | Dartmouth Medical School               |
| Schmidt-Wilcke T et al., 2009 <sup>49</sup> | MCI < CN | 18 | local                                  |
| Shiino A et al., 2006 <sup>50</sup>         | AD < CN  | 40 | Shiga University of Medical Science    |
| Shiino A et al., 2006 <sup>50</sup>         | MCI < CN | 20 | Shiga University of Medical Science    |
| Trivedi MA et al., 2006 <sup>51</sup>       | MCI < CN | 15 | University of Wisconsin                |
| Wang P et al., 2019 <sup>52</sup>           | MCI < CN | 17 | local                                  |
| Waragai M et al., 2009 <sup>53</sup>        | AD < CN  | 15 | Tohoku University                      |
| Whitwell JL et al., 2011 <sup>54</sup>      | AD < CN  | 14 | Mayo Clinic                            |
| Whitwell JL et al., 2011 <sup>54</sup>      | AD < CN  | 14 | Mayo Clinic                            |

|                                   |           |    |                                   |
|-----------------------------------|-----------|----|-----------------------------------|
| Xie S et al., 2006 <sup>55</sup>  | AD < CN   | 13 | Peeking University First Hospital |
| Yi D et al., 2015 <sup>56</sup>   | MCI+ < CN | 10 | Seoul National University         |
| Yi D et al., 2015 <sup>56</sup>   | MCI- < CN | 10 | Seoul National University         |
| Zahn R et al., 2005 <sup>57</sup> | AD < CN   | 10 | University of Freiburg            |
| Zhao Z et al., 2014 <sup>58</sup> | aMCI < CN | 20 | Xuanwu Hospital                   |

Table 1: List of publications included in the meta-analysis. AD: Alzheimer’s disease, MCI: Mild cognitive impairment, Conv: MCI converters, Non: MCI non-converters, EOAD: Early-onset Alzheimer’s disease, LOAD: Late-onset Alzheimer’s disease, MCI+: MCI with high cerebral amyloid-beta protein ( $A\beta$ ) deposition, MCI-: MCI with no or little cerebral amyloid-beta protein ( $A\beta$ ) deposition.  $n$  indicates the number of participants involved in each study.

### 3 ADNI CNN training

For AD classification, ModelB44 achieved the best accuracy and ModelD obtained the lowest performance. Figure 7 shows the evolution of training and validation losses for ModelB44 and ModelD44. For ModelB44, both training loss and validation loss decreased over time and the training stopped before overfitting. ModelD44, on the opposite, failed to learn: training loss and validation losses remained almost the same. This issue could come from the large size of the ModelD. Model sizes reported in Table 2 indeed indicate that ModelD contains the largest number of trainable parameters.

| $c$ | ModelA | ModelB | ModelC  | ModelD  |
|-----|--------|--------|---------|---------|
| 24  | 239186 | 186290 | 342362  | 526658  |
| 28  | 313066 | 229402 | 441390  | 691234  |
| 32  | 396674 | 275970 | 552418  | 877762  |
| 36  | 490010 | 325994 | 675446  | 1086242 |
| 40  | 593074 | 379474 | 810474  | 1316674 |
| 44  | 705866 | 436410 | 957502  | 1569058 |
| 48  | 828386 | 496802 | 1116530 | 1843394 |
| 52  | 960634 | 560650 | 1287558 | 2139682 |

Table 2: Number of trainable parameters for ModelA, ModelB, ModelC and ModelD ( $c$  indicates the number of channels)

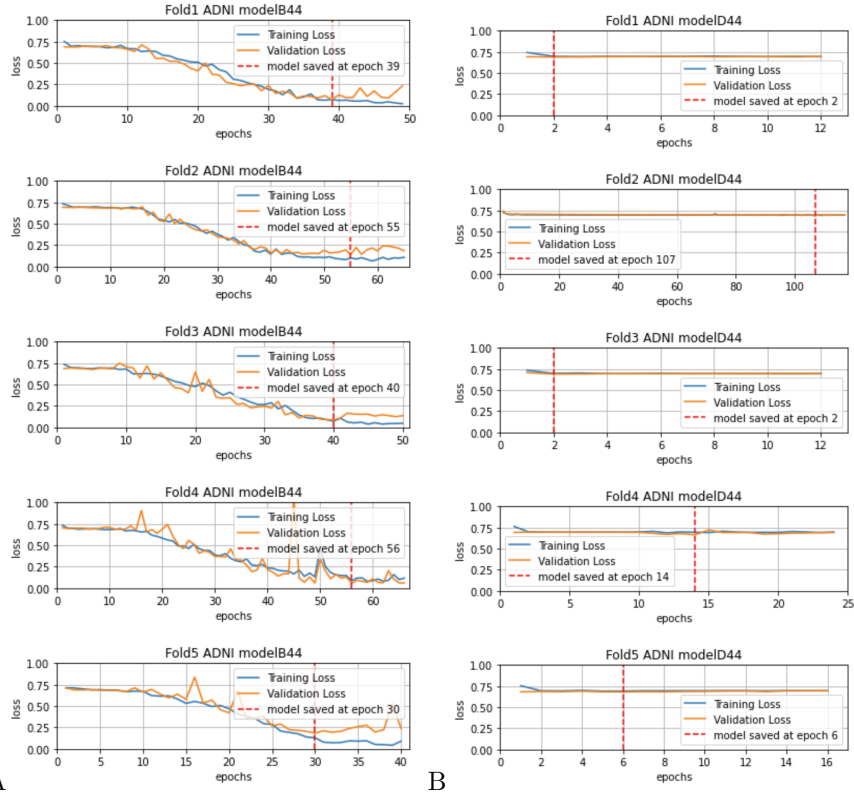

Figure 7: Evolution of training and validation losses for ModelB44 (A) and ModelD44 (B), for each fold of the 5-fold cross-validation conducted on the clinical data.

| $c$ | ME28   | ME24   | ME22   | ME20   | ME18   | ME16   | ME10   | ME8    |
|-----|--------|--------|--------|--------|--------|--------|--------|--------|
| 8   | 48362  | 41386  | 37898  | 34410  | 30922  | 27434  | 16970  | 13402  |
| 10  | 74552  | 63672  | 58232  | 52792  | 47352  | 41912  | 25592  | 20032  |
| 12  | 106382 | 90734  | 82910  | 75086  | 67262  | 59438  | 35966  | 27974  |
| 14  | 143852 | 122572 | 111932 | 101292 | 90652  | 80012  | 48092  | 37228  |
| 16  | 186962 | 159186 | 145298 | 131410 | 117522 | 103634 | 61970  | 47794  |
| 20  | 290102 | 246742 | 225062 | 203382 | 181702 | 160022 | 94982  | 72862  |
| 24  | 415802 | 353402 | 322202 | 291002 | 259802 | 228602 | 135002 | 103178 |
| 28  | 564062 | 479166 | 436718 | 394270 | 351822 | 309374 | 182030 | 138742 |

Table 3: Number of parameters for all the ModelE architectures tested, for all numbers of channels  $c$  and all the numbers of layers. ME28 refers to ModelE with 28 layers.

## 4 ADNI Dice overlaps

Figure 8 reports all the Dice overlaps measured between the smoothed heatmaps derived for the ModelB44 and ModelE18-20 and the meta-analysis ALE map. ModelB44 achieved the best 5-fold cross-validation of 87.24% across all tested 3D CNN models. ModelE18-20 achieved the best 5-fold cross-validation of 81.08% across all tested ModelE models.

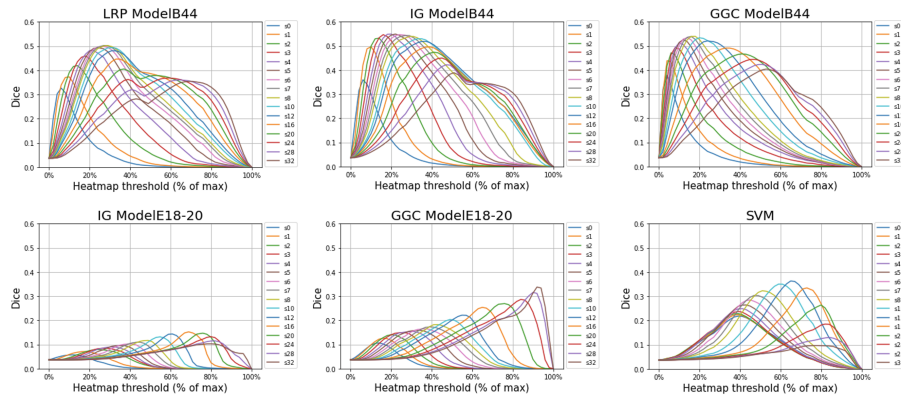

Figure 8: Dice overlap between all the smoothed heatmaps and the meta-analysis map.  $s_0$  corresponds to the heatmaps before smoothing,  $s_1$  corresponds to the heatmaps after 1 mm FWHM Gaussian smoothing, and similarly for other smoothing FWHM.

## References

1. Barbeau EJ, Ranjeva JP, Didic M, Confort-Gouny S, Felician O, Soulier E, Cozzone PJ, Ceccaldi M, Poncet M. Profile of memory impairment and gray matter loss in amnesic mild cognitive impairment. *Neuropsychologia*. 2008;46(4):1009–1019.
2. Baron JC, Chetelat G, Desgranges B, Percey G, Landeau B, La Sayette V de, Eustache F. In vivo mapping of gray matter loss with voxel-based morphometry in mild Alzheimer’s disease. *NeuroImage*. 2001; 14(2):298–309.
3. Baxter LC, Sparks DL, Johnson SC, Lenoski B, Lopez JE, Connor DJ, Sabbagh MN. Relationship of cognitive measures and gray and white matter in Alzheimer’s disease. *J Alzheimers Dis*. 2006;9(3):253–260.
4. Bell-McGinty S, Lopez OL, Meltzer CC, Scanlon JM, Whyte EM, Dekosky ST, Becker JT. Differential cortical atrophy in subgroups of mild cognitive impairment. *Arch Neurol*. 2005; 62(9):1393–1397.

5. Berlingeri M, Bottini G, Basilico S, Silani G, Zanardi G, Sberna M, Colombo N, Sterzi R, Scialfa G, Paulesu E. Anatomy of the episodic buffer: a voxel-based morphometry study in patients with dementia. *Behav Neurol.* 2008;19(1-2):29–34.
6. Bozzali M, Giuliotti G, Basile B, Serra L, Spano B, Perri R, Giubilei F, Marra C, Caltagirone C, Cercignani M. Damage to the cingulum contributes to Alzheimer’s disease pathophysiology by deafferentation mechanism. *Hum Brain Mapp.* 2012;33(6):1295–1308.
7. Bozzali M, Filippi M, Magnani G, Cercignani M, Franceschi M, Schiatti E, Castiglioni S, Mossini R, Falautano M, Scotti G, Comi G, Falini A. The contribution of voxel-based morphometry in staging patients with mild cognitive impairment. *Neurol.* 2006;67(3):453–460.
8. Brambati SM, Belleville S, Kergoat M, Chayer C, Gauthier S, Joubert S. Single- and multiple-domain amnesic mild cognitive impairment: two sides of the same coin? *Dement Geriatr Cogn Disord.* 2009; 28(6):541–549.
9. Brenneis C, Wenning GK, Egger KE, Schocke M, Trieb T, Seppi K, Marksteiner J, Ransmayr G, Benke T, Poewe W. Basal forebrain atrophy is a distinctive pattern in dementia with Lewy bodies. *Neuroreport.* 2004;15(11):1711–1714.
10. Brys M, Glodzik L, Mosconi L, Switalski R, Santi S de, Pirraglia E, Rich K, Kim BC, Mehta P, Zinkowski R, Pratico D, Wallin A, Zetterberg H, Tsui WH, Rusinek H, Blennow K, Leon MJ de. Magnetic resonance imaging improves cerebrospinal fluid biomarkers in the early detection of Alzheimer’s disease. *J Alzheimers Dis.* 2009;16(2):351–362.
11. Canu E, Frisoni GB, Agosta F, Pievani M, Bonetti M, Filippi M. Early and late onset Alzheimer’s disease patients have distinct patterns of white matter damage. *Neurobiol Aging.* 2012;33(6):1023–1033.
12. Caroli A, Testa C, Geroldi C, Nobili F, Barnden LR, Guerra UP, Bonetti M, Frisoni GB. Cerebral perfusion correlates of conversion to Alzheimer’s disease in amnesic mild cognitive impairment. *J Neurol.* 2007; 254(12): 1698–1707.
13. Chen Y, Wolk DA, Reddin JS, et al. Voxel-level comparison of arterial spin-labeled perfusion MRI and FDG-PET in Alzheimer disease. *Neurology.* 2011;77(22):1977-1985.
14. Chetelat G, Desgranges B, La Sayette V de, Viader F, Eustache F, Baron J. Mapping gray matter loss with voxel-based morphometry in mild cognitive impairment. *Neuroreport.* 2002;13(15):1939–1943.
15. Colloby SJ, O’Brien JT, Taylor JP. Patterns of cerebellar volume loss in dementia with Lewy bodies and Alzheimers disease: A VBM-DARTEL study. *Psychiatry Res.* 2014;223(3):187-191.

16. Defrancesco M, Egger K, Marksteiner J, Esterhammer R, Hinterhuber H, Deisenhammer EA, Schocke M. Changes in white matter integrity before conversion from mild cognitive impairment to Alzheimer’s disease. *PLoS One*. 2014;9(8):e106062.
17. Derflinger S, Sorg C, Gaser C, Myers N, Arsic M, Kurz A, Zimmer C, Wohlschläger A, Muhlau M. Grey-matter atrophy in Alzheimer’s disease is asymmetric but not lateralized. *J Alzheimers Dis*. 2011; 25(2):347–357.
18. Dos Santos V, Thomann PA, Wustenberg T, Seidl U, Essig M, Schroder J. Morphological cerebral correlates of CERAD test performance in mild cognitive impairment and Alzheimer’s disease. *J Alzheimers Dis*. 2011;23(3):411–420.
19. Farrow TFD, Thiyagesh SN, Wilkinson ID, Parks RW, Ingram L, Woodruff PWR. Fronto-temporal-lobe atrophy in early-stage Alzheimer’s disease identified using an improved detection methodology. *Psychiatry Res*. 2007; 155(1):11–19.
20. Feldmann A, Trauninger A, Toth L, et al. Atrophy and decreased activation of fronto-parietal attention areas contribute to higher visual dysfunction in posterior cortical atrophy. *Psychiatry Res*. 2008; 164(2):178-184.
21. Ford AH, Almeida OP, Flicker L, Garrido GJ, Greenop KR, Foster JK, Etherton-Beer C, van Bockxmeer FM, Lautenschlager NT. Grey matter changes associated with deficit awareness in mild cognitive impairment: a voxel-based morphometry study. *J Alzheimers Dis*. 2014; 42(4):1251–1259.
22. Gee J, Ding L, Xie Z, Lin M, DeVita C, Grossman M. Alzheimer’s disease and frontotemporal dementia exhibit distinct atrophy-behavior correlates: a computer-assisted imaging study. *Acad Radiology*. 2003; 10(12):1392–1401.
23. Gold BT, Jiang Y, Jicha GA, Smith CD. Functional response in ventral temporal cortex differentiates mild cognitive impairment from normal aging. *Hum Brain Mapp*. 2010;31(8):1249–1259.
24. Guo X, Wang Z, Li K, Li Z, Qi Z, Jin Z, Yao L, Chen K. Voxel-based assessment of gray and white matter volumes in Alzheimer’s disease. *Neurosci Lett*. 2010;468(2):146–150.
25. Hamalainen A, Tervo S, Grau-Olivares M, et al. Voxel-based morphometry to detect brain atrophy in progressive mild cognitive impairment. *Neuroimage*. 2007;37(4):1122-1131.
26. Han Y, Lui S, Kuang W, Lang Q, Zou L, Jia J. Anatomical and functional deficits in patients with amnesic mild cognitive impairment. *PLoS One*. 2012;7(2):e28664.

27. Hirao K, Ohnishi T, Matsuda H, Nemoto K, Hirata Y, Yamashita F, Asada T, Iwamoto T. Functional interactions between entorhinal cortex and posterior cingulate cortex at the very early stage of Alzheimer's disease using brain perfusion single-photon emission computed tomography. *Nucl Med Commun.* 2006;27(2):151–156.
28. Honea RA, Thomas GP, Harsha A, Anderson HS, Donnelly JE, Brooks WM, Burns JM. Cardiorespiratory fitness and preserved medial temporal lobe volume in Alzheimer disease. *Alzheimer Dis Assoc Disord.* 2009;23(3):188–197.
29. Hong YJ, Yoon B, Shim YS, Ahn KJ, Yang DW, Lee J. Gray and White Matter Degenerations in Subjective Memory Impairment: Comparisons with Normal Controls and Mild Cognitive Impairment. *J Kor Med Sci.* 2015;30(11):1652–1658.
30. Hornberger M, Geng J, Hodges, JR. Convergent grey and white matter evidence of orbitofrontal cortex changes related to disinhibition in behavioural variant frontotemporal dementia. *Brain.* 2011; 134(Pt 9): 2502–2512.
31. Huang CW, Hsu SW, Chang YT, et al. Cerebral Perfusion Insufficiency and Relationships with Cognitive Deficits in Alzheimer's Disease: A Multiparametric Neuroimaging Study. *Sci Rep.* 2018;8(1):1541.
32. Ibrahim I, Horacek J, Bartos A, Hajek M, Ripova D, Brunovsky M, Tintera J. Combination of voxel based morphometry and diffusion tensor imaging in patients with Alzheimer's disease. *Neurol Endocrin Lett.* 2009;30(1):39–45.
33. Imabayashi E, Matsuda H, Tabira T, et al. Comparison between brain CT and MRI for voxel-based morphometry of Alzheimer's disease. *Brain Behav.* 2013;3(4):487-493.
34. Kim S, Youn YC, Hsiung GY, Ha SY, Park KY, Shin HW, Kim DK, Kim SS, Kee BS. Voxel-based morphometric study of brain volume changes in patients with Alzheimer's disease assessed according to the Clinical Dementia Rating score. *J Clin Neurosci.* 2011;18(7):916–921.
35. Lagarde J, Valabregue R, Corvol JC, Garcin B, Volle E, Le Ber I, Vidailhet M, Dubois B, Levy R. Why do patients with neurodegenerative frontal syndrome fail to answer: 'In what way are an orange and a banana alike?'. *Brain.* 2015;138(Pt 2):456–471.
36. Mazere J, Prunier C, Barret O, et al. In vivo SPECT imaging of vesicular acetylcholine transporter using [(123)I]-IBVM in early Alzheimer's disease. *Neuroimage.* 2008;40(1):280-288.

37. Miettinen PS, Pihlajamaki M, Jauhiainen AM, et al. Structure and function of medial temporal and posteromedial cortices in early Alzheimer's disease. *Eur J Neurosci.* 2011;34(2):320-330.
38. Migliaccio R, Agosta F, Possin KL, Canu E, Filippi M, Rabinovici GD, Rosen HJ, Miller BL, Gorno-Tempini ML. Mapping the Progression of Atrophy in Early- and Late-Onset Alzheimer's Disease. *J Alzheimers Dis.* 2015;46(2):351-364.
39. Mitolo M, Gardini S, Fasano F, Crisi G, Pelosi A, Pazzaglia F, Caffarra P. Visuospatial memory and neuroimaging correlates in mild cognitive impairment. *J Alzheimers Dis.* 2013;35(1):75-90.
40. Mok GS, Wu YY, Lu KM, Wu J, Chen LK, Wu TH. Evaluation of the screening power of Cognitive Abilities Screening Instrument for probable Alzheimer's disease using voxel-based morphometry. *Clin Imaging.* 2012;36(1):46-53.
41. Pa J, Boxer A, Chao LL, Gazzaley A, Freeman K, Kramer J, Miller BL, Weiner MW, Neuhaus J, Johnson JK. Clinical-neuroimaging characteristics of dysexecutive mild cognitive impairment. *Ann Neurol.* 2009; 65(4): 414-423.
42. Pennanen C, Testa C, Laakso MP, Hallikainen M, Helkala E, Hanninen T, Kivipelto M, Kononen M, Nissinen A, Tervo S, Vanhanen M, Vanninen R, Frisoni GB, Soininen H. A voxel based morphometry study on mild cognitive impairment. *J Neurol Neurosurg Psychiatry.* 2005;76(1):11-14.
43. Polat F, Demirel SO, Kitis O, Simsek F, Haznedaroglu DI, Coburn K, Kumral E, Gonul AS. Computer based classification of MR scans in first time applicant Alzheimer patients. *Curr Alzheimer Res.* 2012; 9(7):789-794.
44. Raji CA, Lopez OL, Kuller LH, Carmichael OT, Becker JT. Age, Alzheimer disease, and brain structure. *Neurology.* 2009; 73(22): 1899-1905.
45. Rami L, Gomez-Anson B, Monte GC, Bosch B, Sanchez-Valle R, Molinuevo JL. Voxel based morphometry features and follow-up of amnesic patients at high risk for Alzheimer's disease conversion. *Int J Geriatr Psychiatry.* 2009;24(8):875-884.
46. Rémy F, Mirrashed F, Campbell B, Richter W. Verbal episodic memory impairment in Alzheimer's disease: a combined structural and functional MRI study. *NeuroImage.* 2005;25(1):253-266.
47. Samuraki M, Matsunari I, Chen WP, Yajima K, Yanase D, Fujikawa A, Takeda N, Nishimura S, Matsuda H, Yamada M. Partial volume effect-corrected FDG PET and grey matter volume loss in patients with



- mild Alzheimer's disease. *Eur J Nucl Med Mol Imaging*. 2007; 34(10): 1658–1669.
48. Saykin AJ, Wishart HA, La Rabin, Santulli RB, La Flashman, West JD, McHugh TL, Mamourian AC. Older adults with cognitive complaints show brain atrophy similar to that of amnesic MCI. *Neurol*. 2006;67(5):834–842.
  49. Schmidt-Wilcke T, Poljansky S, Hierlmeier S, Hausner J, Ibach B. Memory performance correlates with gray matter density in the ento-/perirhinal cortex and posterior hippocampus in patients with mild cognitive impairment and healthy controls a voxel based morphometry study. *NeuroImage*. 2009; 47(4): 1914–1920.
  50. Shiino A, Watanabe T, Maeda K, Kotani E, Akiguchi I, Matsuda M. Four subgroups of Alzheimer's disease based on patterns of atrophy using VBM and a unique pattern for early onset disease. *NeuroImage*. 2006;33(1):17–26.
  51. Trivedi MA, Wichmann AK, Torgerson BM, Ward MA, Schmitz TW, Ries ML, Kosciak RL, Asthana S, Johnson SC. Structural MRI discriminates individuals with Mild Cognitive Impairment from age-matched controls: a combined neuropsychological and voxel based morphometry study. *Alzheimers Dement*. 2006;2(4):296–302.
  52. Wang P, Li R, Yu J, Huang Z, Li J. Frequency-Dependent Brain Regional Homogeneity Alterations in Patients with Mild Cognitive Impairment during Working Memory State Relative to Resting State. *Front Aging Neurosci*. 2016 Mar 24;8:60.
  53. Waragai M, Okamura N, Furukawa K, Tashiro M, Furumoto S, Funaki Y, Kato M, Iwata R, Yanai K, Kudo Y, Arai H. Comparison study of amyloid PET and voxel-based morphometry analysis in mild cognitive impairment and Alzheimer's disease. *J Neurol Sci*. 2009;285(1-2):100–108.
  54. Whitwell JL, Jack CR, JR, Przybelski SA, Parisi JE, Senjem ML, Boeve BF, Knopman DS, Petersen RC, Dickson DW, Josephs KA. Temporoparietal atrophy: a marker of AD pathology independent of clinical diagnosis. *Neurobiol Aging*. 2011; 32(9): 1531–1541.
  55. Xie S, Xiao JX, Gong GL, Zang YF, Wang YH, Wu HK, Jiang XX. Voxel-based detection of white matter abnormalities in mild Alzheimer disease. *Neurol*. 2006;66(12):1845–1849.
  56. Yi D, Choe YM, Byun MS, Sohn BK, Seo EH, Han J, Park J, Woo JI, Lee DY. Differences in functional brain connectivity alterations associated with cerebral amyloid deposition in amnesic mild cognitive impairment. *Front Aging Neurosci*. 2015;7:15.

57. Zahn R, Buechert M, Overmans J, Talazko J, Specht K, Ko CW, Thiel T, Kaufmann R, Dykieriek P, Juengling F, Hull M. Mapping of temporal and parietal cortex in progressive nonfluent aphasia and Alzheimer's disease using chemical shift imaging, voxel-based morphometry and positron emission tomography. *Psychiatry Res.* 2005;140(2):115–131.
58. Zhao Z, Lu J, Jia X, Chao W, Han Y, Jia J, Li K. Selective changes of resting-state brain oscillations in aMCI: an fMRI study using ALFF. *Biomed Res Int.* 2014;2014:920902.
59. He, K., Zhang, X., Ren, S. and Sun, J., 2016. Deep residual learning for image recognition. In *Proceedings of the IEEE conference on computer vision and recognition* (pp. 770-778).
